# Supplementary material
Source: PubMed Central journal article supplement (PMC9258788)
Supplement: NIHMS1818957-supplement-Supplementary_Tables_1-3.pdf [file NIHMS1818957-supplement-Supplementary_Tables_1-3.pdf]

**Supplementary Table 1:** Hospital admission liver tests of 1110 patients with COVID-19 and normal liver tests prior to hospital admission

| Characteristic                 | Total<br>(n=1110) | Non-severe<br>COVID-19<br>(n=736) | Severe<br>COVID-19<br>(n=374) | p-value |
|--------------------------------|-------------------|-----------------------------------|-------------------------------|---------|
| Age, mean (SD), years          | 63.1 (18.0)       | 62.1 (18.4)                       | 65.1 (17.0)                   | 0.008   |
| Male gender, n (%)             | 586 (52.8%)       | 360 (48.9%)                       | 226 (60.4%)                   | <0.001  |
| BMI, mean (SD)                 | 30.1 (7.7)        | 29.6 (7.3)                        | 31.2 (8.3)                    | 0.002   |
| Diabetes mellitus, n (%)       | 374 (33.7%)       | 221 (30.0%)                       | 153 (40.9%)                   | <0.001  |
| Obesity, n (%)                 | 475 (44.5%)       | 300 (42.8%)                       | 175 (47.7%)                   | 0.13    |
| AST, median (range), U/L       | 41 (12-2098)      | 38 (13-1399)                      | 52 (12-2098)                  | <0.001  |
| AST abnormal (>33 U/L)         | 706 (67.1%)       | 410 (59.9%)                       | 296 (80.4%)                   | <0.001  |
| ALT, median (IQR), U/L         | 29 (6-1831)       | 27 (6-1831)                       | 32 (8-1441)                   | <0.001  |
| ALT, abnormal (>34 U/L)        | 440 (41.5%)       | 268 (38.8%)                       | 172 (46.5%)                   | 0.015   |
| ALP, median (IQR), U/L         | 71 (20-919)       | 72 (20-609)                       | 69 (32-919)                   | 0.34    |
| ALP abnormal (>122 U/L)        | 89 (8.4%)         | 57 (8.2%)                         | 32 (8.6%)                     | 0.84    |
| TBIL, median (IQR), mg/dL      | 0.5 (0.1-8.9)     | 0.4 (0.1-4.0)                     | 0.5 (0.2-8.9)                 | <0.001  |
| TBIL, abnormal (>1.2 mg/dL)    | 25 (2.4%)         | 9 (1.3%)                          | 16 (4.4%)                     | 0.002   |
| Albumin, median (IQR) mg/dL    | 3.5 (1.2-5.4)     | 3.6 (1.5-5.4)                     | 3.4 (1.2-4.8)                 | <0.001  |
| Albumin, abnormal (<3.5 mg/dL) | 565 (53.2%)       | 343 (49.7%)                       | 222 (59.7%)                   | 0.002   |

SD = standard deviation; BMI = body mass index; AST = aspartate aminotransferase; ALT = alanine aminotransferase; IQR = interquartile range; ALP = alkaline phosphatase; TBIL = total bilirubin

Severe COVID-19 defined as: death OR ICU stay OR use of mechanical ventilation OR vasopressor requirement, OR ECMO requirement.

**Supplementary Table 2:** Predictors of peak hospitalization abnormal liver tests greater than 5x ULN in patients with normal liver tests prior to hospital admission

| Characteristic                             | AST<br>n = 152 vs. 914                       | ALT<br>n = 222 vs. 1531                      |
|--------------------------------------------|----------------------------------------------|----------------------------------------------|
| Age, mean, years                           | 57.3 vs. 64.5<br>(p<0.001)                   | 55.6 vs 64.7<br>(p<0.001)                    |
| Male gender, n (%)                         | 65.8 vs. 51.6%<br>(p=0.001)                  | 71.9 vs 50.8%<br>(p<0.001)                   |
| BMI (mean)                                 | 31.1 vs. 30.0<br>(0.09)                      | 30.9 vs 30.0<br>(p=0.21)                     |
| Diabetes mellitus (%)                      | 25.7 vs. 35.7%<br>(p=0.016)                  | 24.0 vs 35.8%<br>(p=0.005)                   |
| Admission median AST and range (U/L)       | 88 (13-2098) vs. 38 (12-160)<br>(<0.001)     | 75 (13-2098) vs 39 (12-451)<br>(p<0.001)     |
| Admission median ALT and range (U/L)       | 58 (9-1831) vs. 27 (6-185)<br>(p<0.001)      | 57 (9-1831) vs. 27 (6-170)<br>(p<0.001)      |
| Admission median ALP and range (U/L)       | 73 (21-609) vs. 71 (20-919)<br>(p=0.31)      | 78 (21-609) vs 71 (20-919)<br>(p=0.030)      |
| Admission median TBIL and range (mg/dL)    | 0.5 (0.2-8.9) vs. 0.4 (0.1-4.0)<br>(p=0.017) | 0.5 (0.2-4.0) vs. 0.4 (0.1-8.9)<br>(p=0.009) |
| Admission median albumin and range (mg/dL) | 3.4 (2.0-4.7) vs. 3.5 (1.2-5.4)<br>(p<0.001) | 3.4 (2.0-4.7) vs. 3.5 (1.2-5.4)<br>(p<0.001) |
| Hydroxychloroquine use (%)                 | 91.5 vs. 83.9%<br>(p=0.016)                  | 91.8 vs. 84.1%<br>(p=0.015)                  |
| Lopinavir/Ritonavir use (%)                | 9.9 vs. 7.3%<br>(p=0.28)                     | 14.4 vs. 6.6%<br>(p=<0.001)                  |
| Remdesivir use (%)                         | 5.9 vs 2.3%<br>(p=0.028)                     | 6.3 vs. 2.3%<br>(p=0.015)                    |
| Tocilizumab use (%)                        | 70.4 vs. 41.3%<br>(p<0.001)                  | 71.2 vs. 41.4%<br>(p<0.001)                  |

AST = aspartate aminotransferase; ALT = alanine aminotransferase; ALP = alkaline phosphatase; TBIL = total bilirubin; NS = not significant; BMI = body mass index

**Supplementary Table 3:** Association (odds ratio) between admission and peak hospitalization liver tests and clinical outcomes in patients with normal liver tests prior to hospital admission

|                             | ICU admission<br>(multivariate<br>model) | Mechanical ventilation<br>(multivariate model) | Death (multivariate model) |
|-----------------------------|------------------------------------------|------------------------------------------------|----------------------------|
| Age (1-year increase)       | 1.00 (p=NS)                              | 1.00 (p=NS)                                    | 1.09 (p<0.001)             |
| Male                        | 1.56 (p=0.005)                           | 1.89 (p=0.001)                                 | 1.52 (p=NS)                |
| BMI (1-point increase)      | 1.03 (p<0.001)                           | 1.04 (p<0.001)                                 | 1.06 (p<0.001)             |
| Diabetes mellitus           | 1.50 (p=0.01)                            | 1.46 (p=0.04)                                  | 1.39 (p=NS)                |
| <b>Admission</b>            |                                          |                                                |                            |
| Abnormal AST                | 2.95 (p<0.001)                           | 3.40 (p<0.001)                                 | 1.24 (p=NS)                |
| Abnormal ALT                | 0.91 (p=NS)                              | 1.13 (p=NS)                                    | 1.00 (p=NS)                |
| Abnormal ALP                | 1.19 (p=NS)                              | 0.94 (p=0.03)                                  | 1.21 (p=NS)                |
| Abnormal TBIL               | 2.03 (p=NS)                              | 1.56 (p=NS)                                    | 5.66 (p<0.001)             |
| Abnormal albumin            | 1.34 (p=0.05)                            | 1.39 (p=0.07)                                  | 1.21 (p=NS)                |
| <b>Peak Hospitalization</b> |                                          |                                                |                            |
| Abnormal AST                | 2.39 (p=0.01)                            | 8.20 (p=0.04)                                  | 1.29 (p=NS)                |
| Abnormal ALT                | 2.82 (p<0.001)                           | 4.43 (p<0.001)                                 | 1.04 (p=NS)                |
| Abnormal ALP                | 1.88 (p<0.001)                           | 2.57 (p<0.001)                                 | 1.36 (p=NS)                |
| Abnormal TBIL               | 2.55 (p<0.001)                           | 2.97 (p<0.001)                                 | 2.83 (p<0.001)             |
| Abnormal albumin            | 2.14 (p=0.01)                            | 21.01 (p<0.001)                                | 0.75 (p=NS)                |

BMI = body mass index, NS = not significant; AST = aspartate aminotransferase; ALT = alanine aminotransferase; ALP = alkaline phosphatase; TBIL = total bilirubin
